# Supplementary material for: Chiral evasion and stereospecific antifolate resistance in Staphylococcus aureus
Source: PubMed Central journal article supplement (PMC8865654; doi:10.1371/journal.pcbi.1009855), 2022-02-10

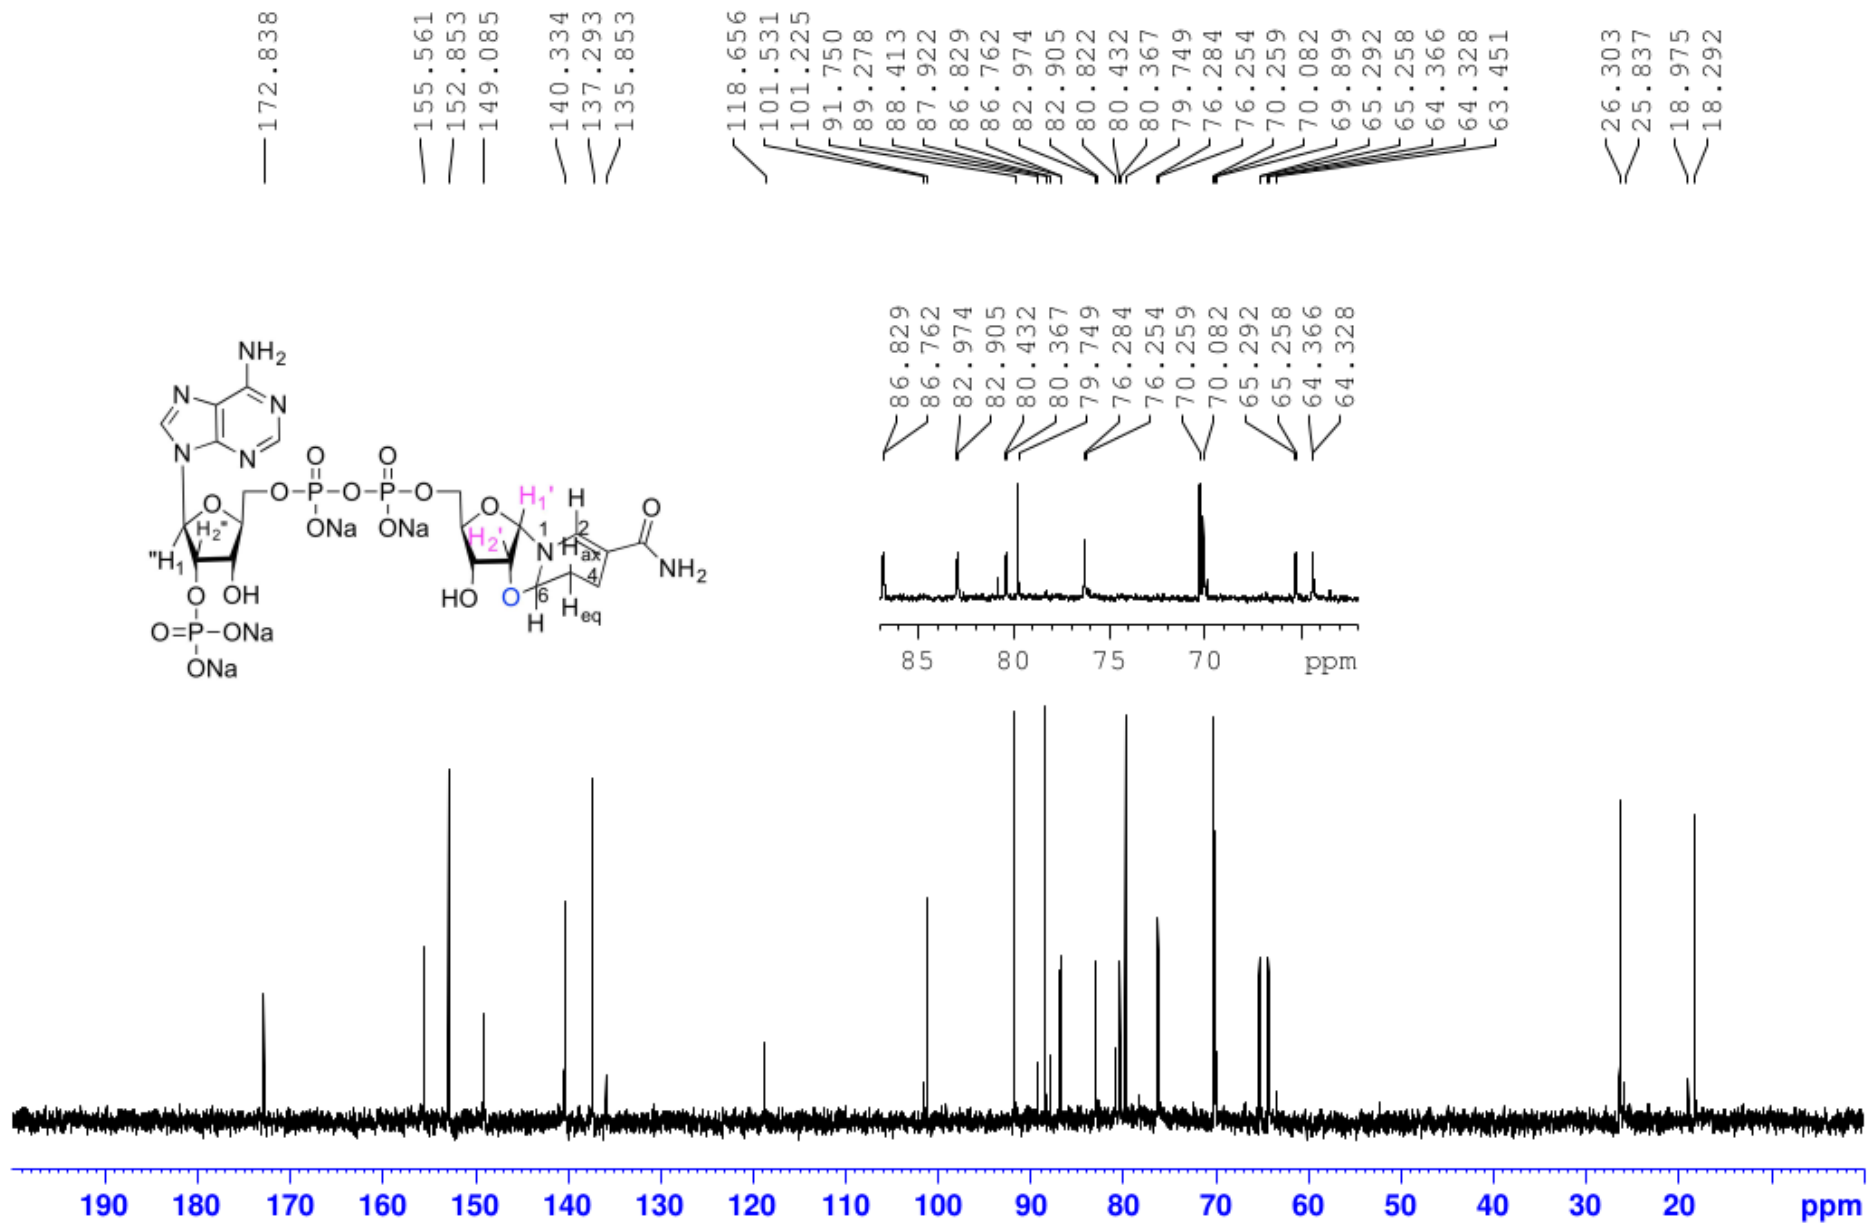

Supplement: pcbi.1009855.s003.pdf [file pcbi.1009855.s003.pdf]
