# Supplementary material for: Chiral evasion and stereospecific antifolate resistance in Staphylococcus aureus
Source: PubMed Central journal article supplement (PMC8865654; doi:10.1371/journal.pcbi.1009855), 2022-02-10

"skk-nb5-cnadph purification with ammo.carbonate" 6 1 "C:\Users\santosh\Desktop\cnadph files"

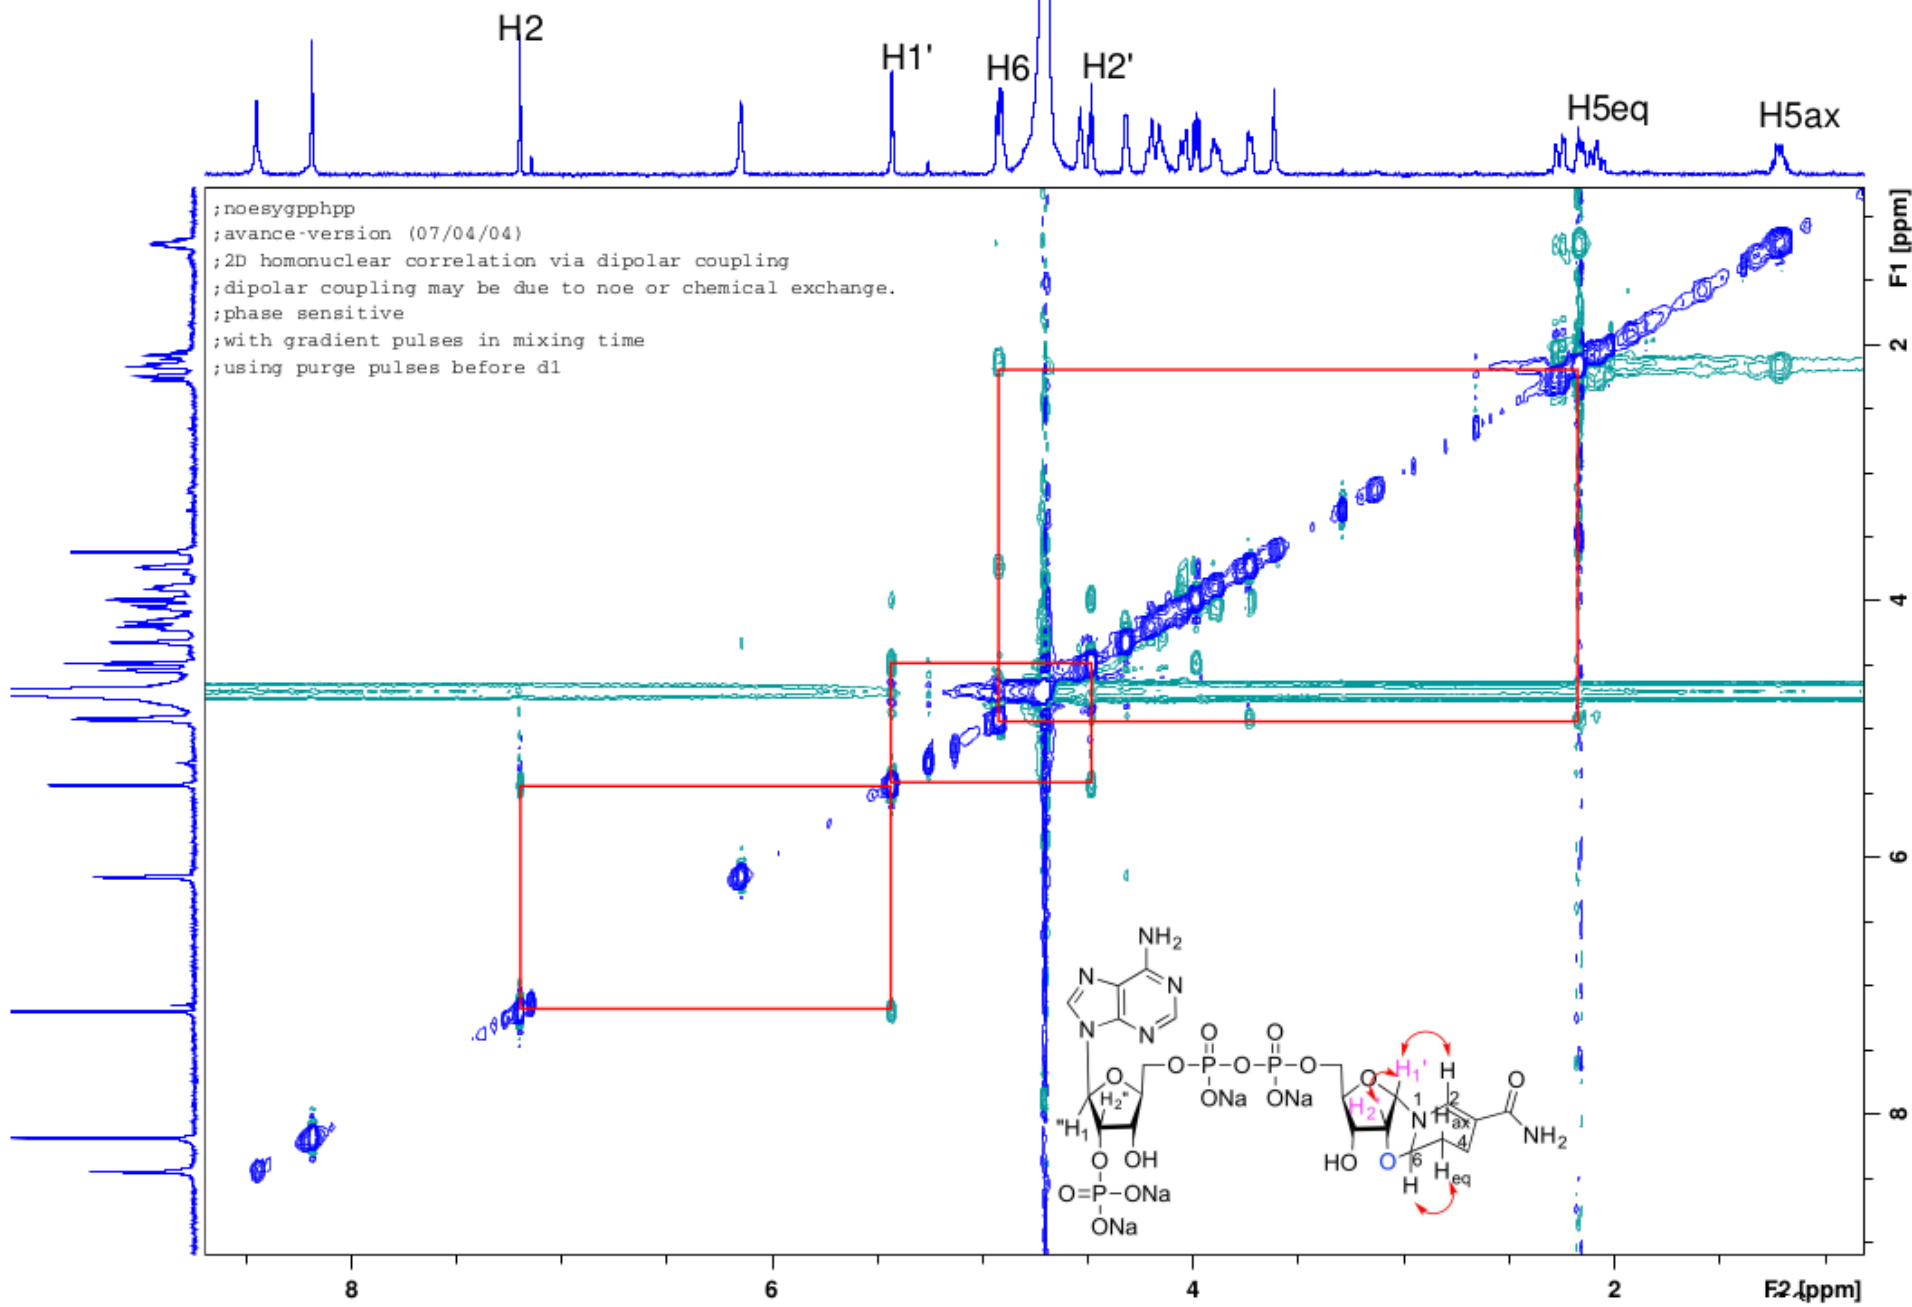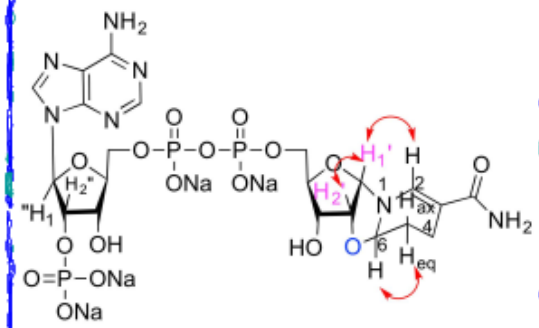

Supplement: pcbi.1009855.s005.pdf [file pcbi.1009855.s005.pdf]
