# Supplementary material for: Chiral evasion and stereospecific antifolate resistance in Staphylococcus aureus
Source: PubMed Central journal article supplement (PMC8865654; doi:10.1371/journal.pcbi.1009855), 2022-02-10

HSQCAD\_20160613.fid 30 1 "C:\Users\nmrlab\Desktop\cnadph files"

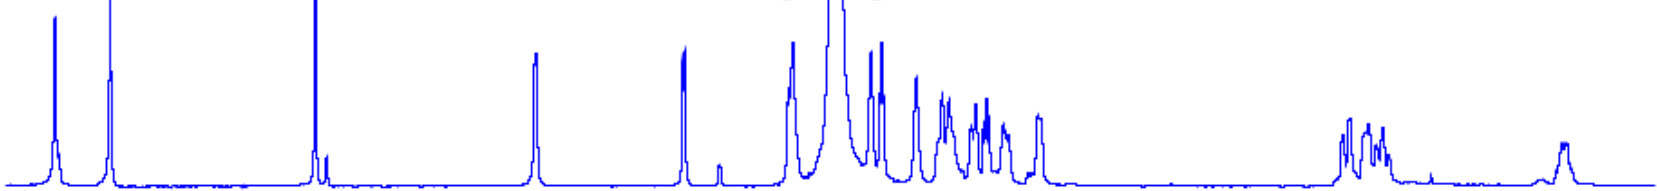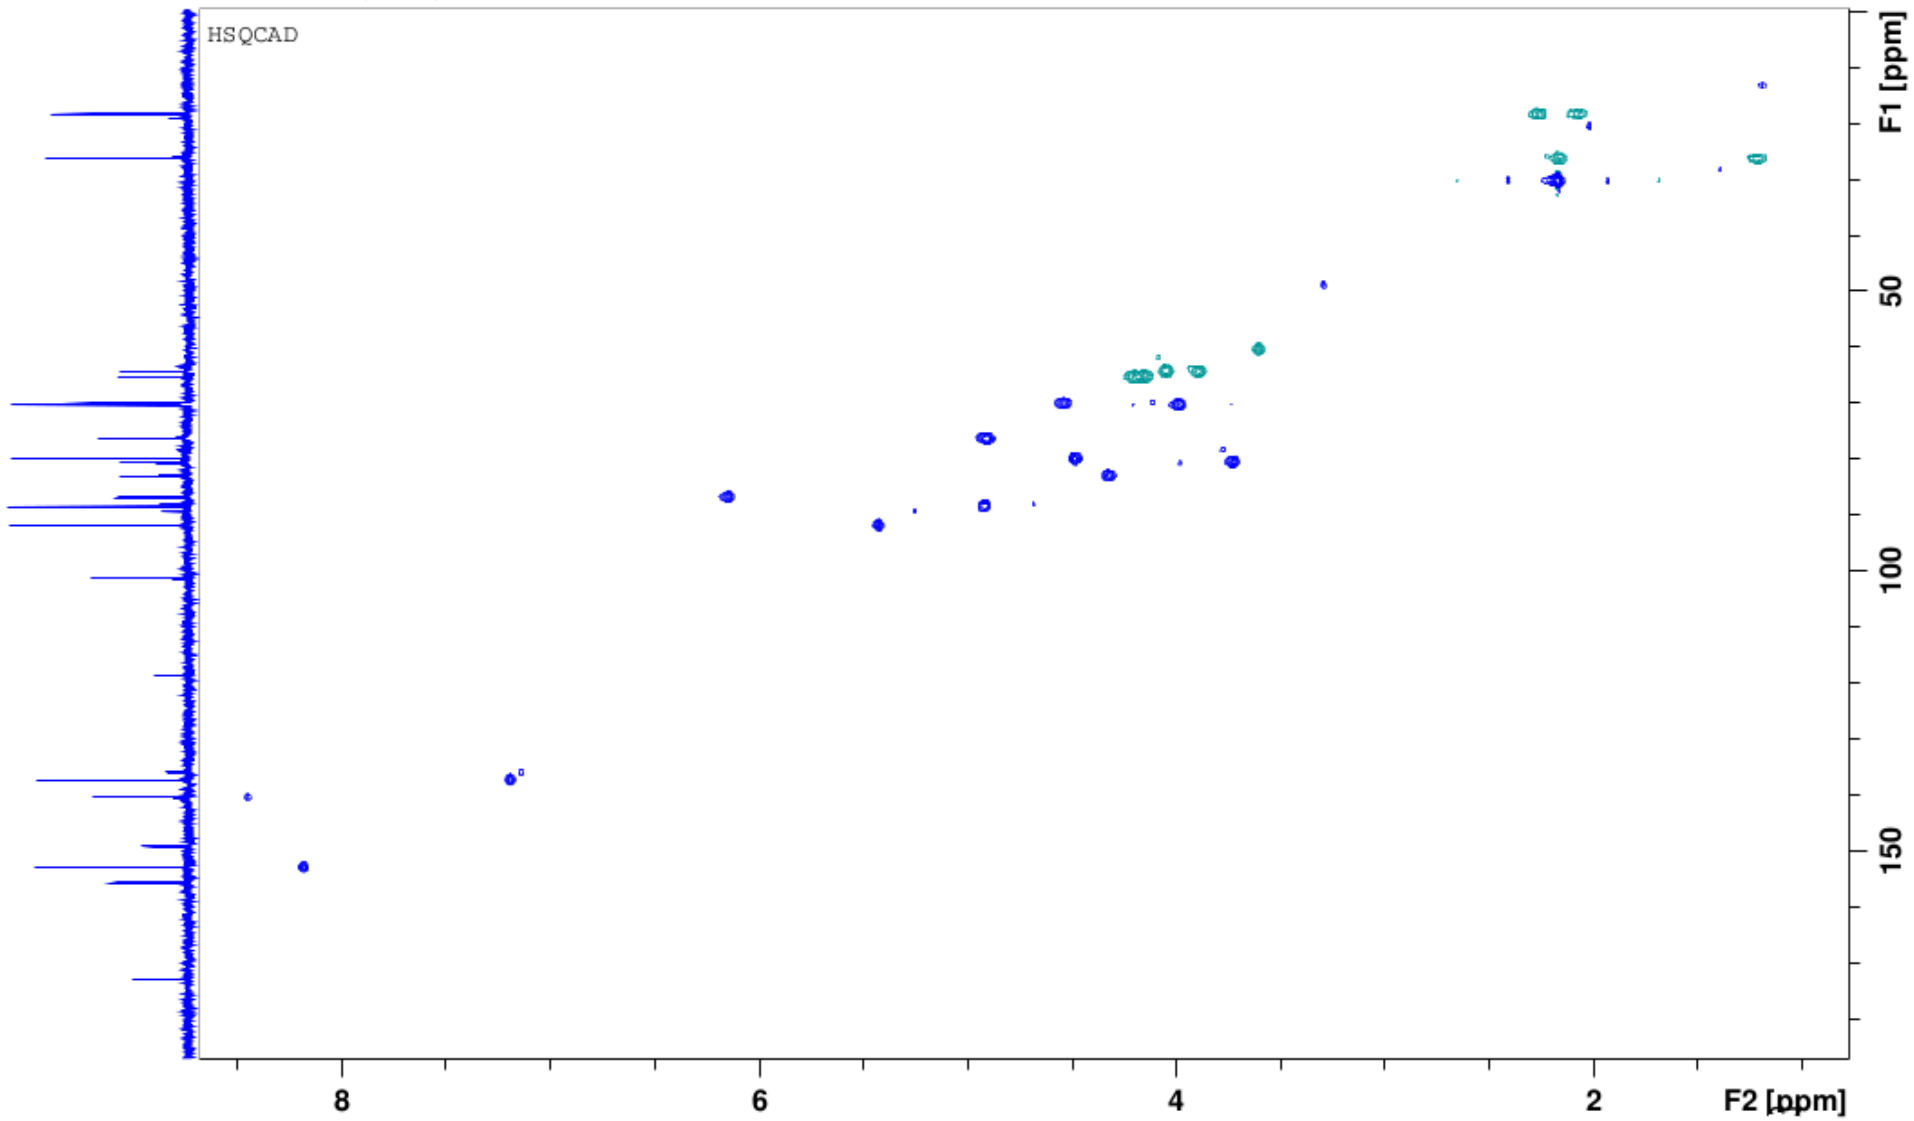

HSQCAD\_20160613.fid 30 1 "C:\Users\nmrlab\Desktop\cnadph files"

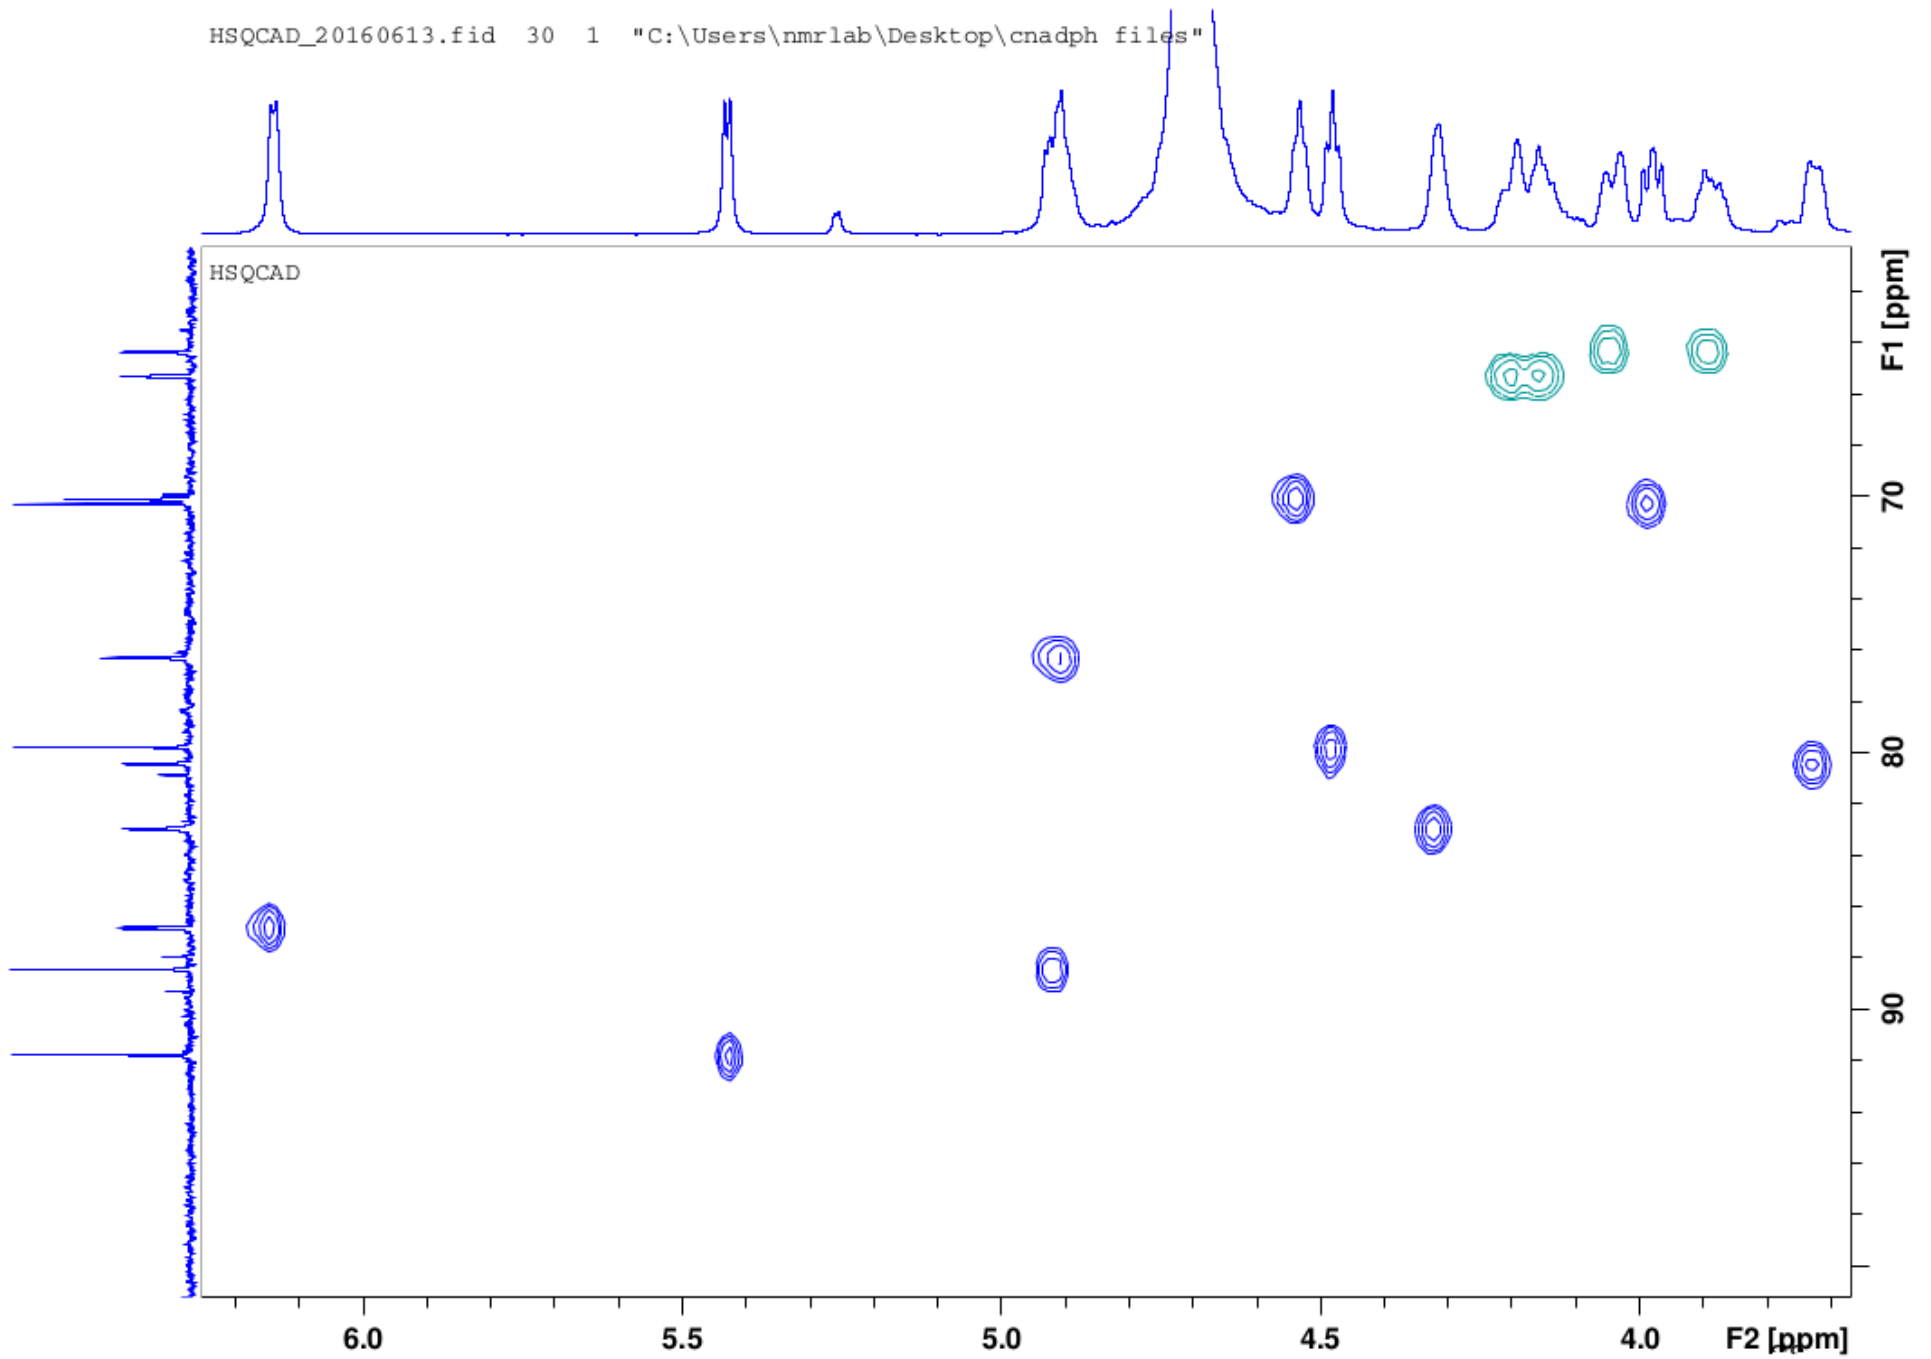

Supplement: pcbi.1009855.s006.pdf [file pcbi.1009855.s006.pdf]
