# Supplementary material for: Chiral evasion and stereospecific antifolate resistance in Staphylococcus aureus
Source: PubMed Central journal article supplement (PMC8865654; doi:10.1371/journal.pcbi.1009855), 2022-02-10

<sup>1</sup>H spectrum

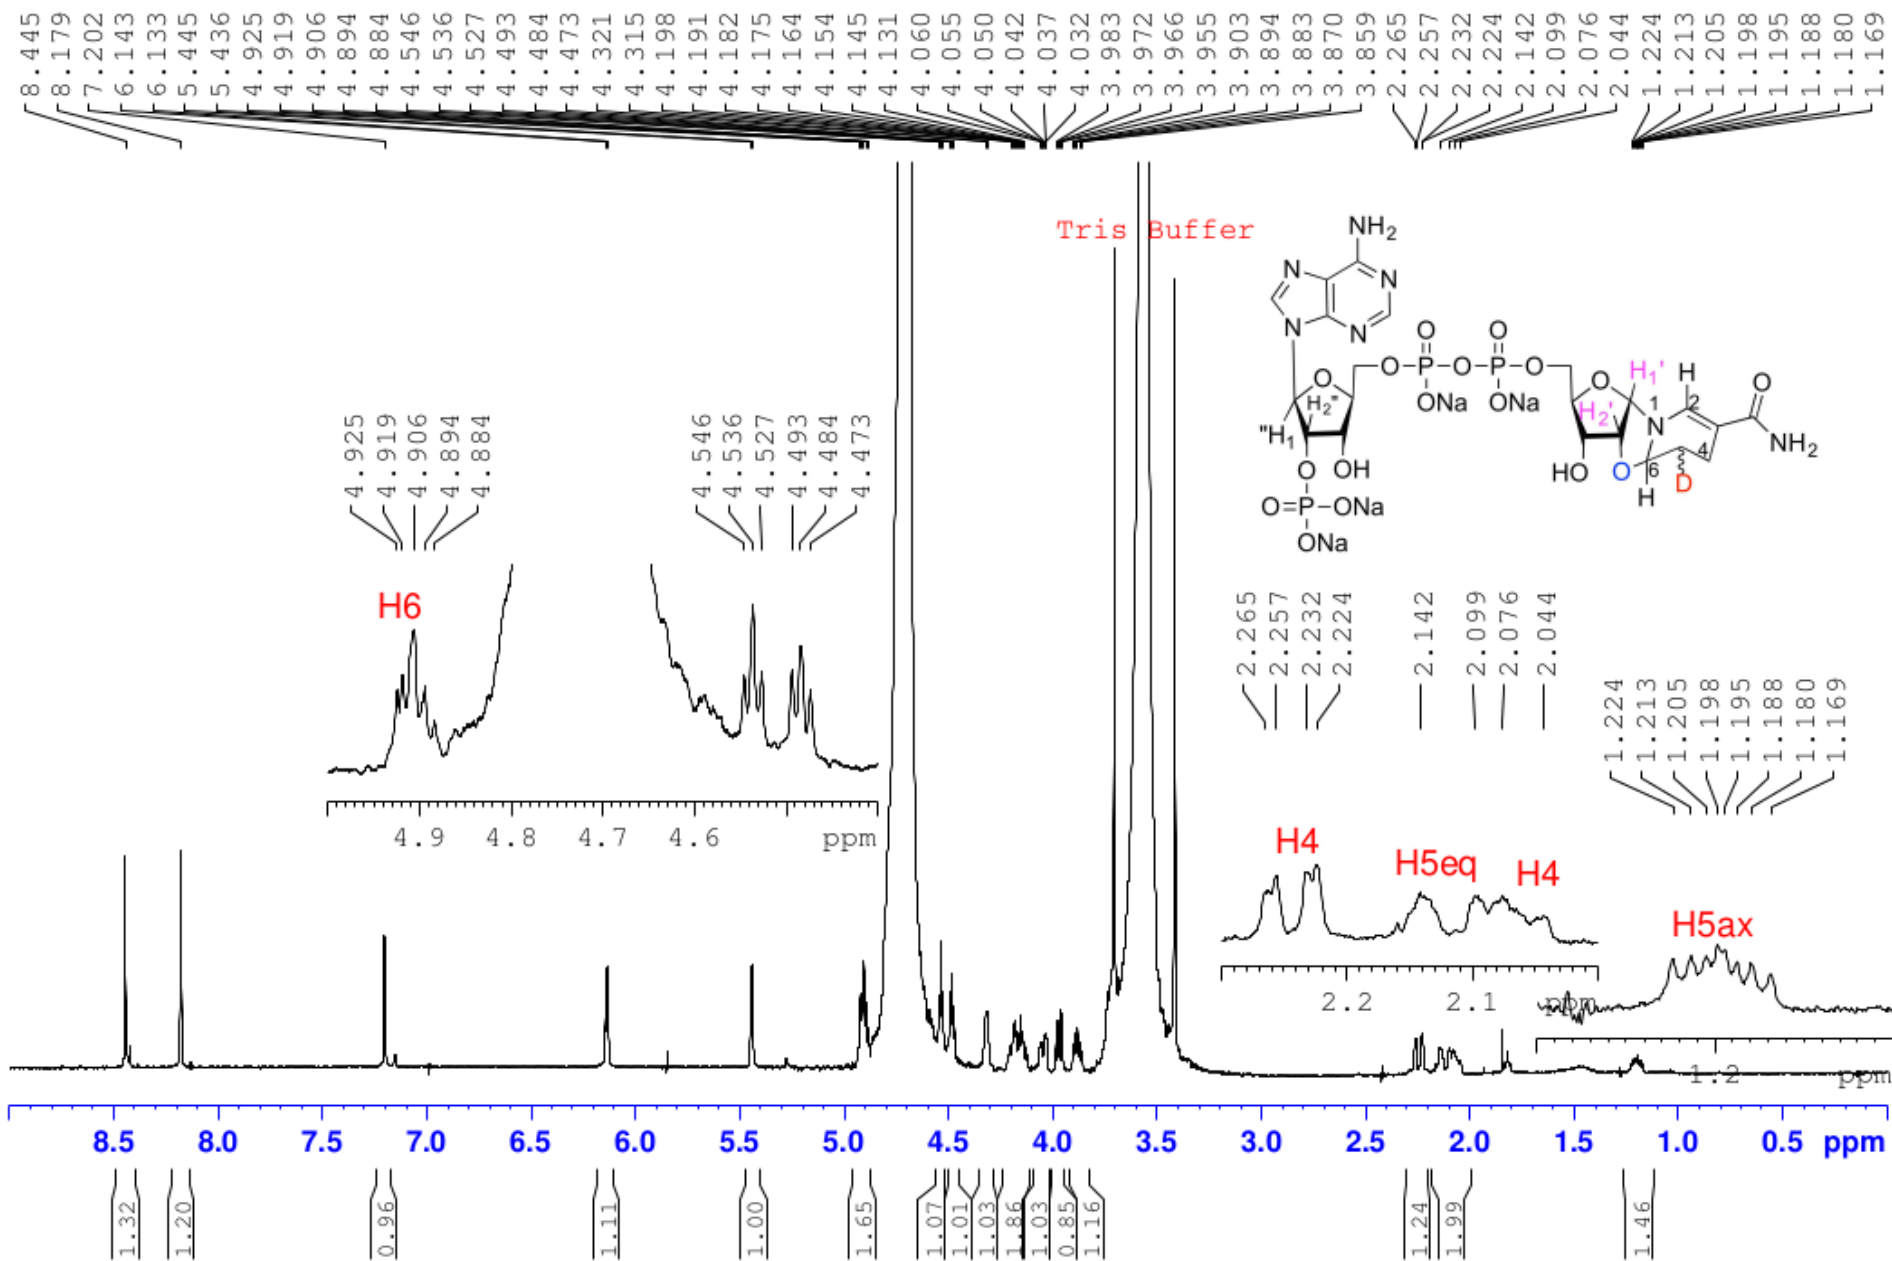

Supplement: pcbi.1009855.s008.pdf [file pcbi.1009855.s008.pdf]
