# Supplementary material for: Chiral evasion and stereospecific antifolate resistance in Staphylococcus aureus
Source: PubMed Central journal article supplement (PMC8865654; doi:10.1371/journal.pcbi.1009855), 2022-02-10

"skk-nb5-cnadph-fr 3 and 4-second batch purif" 4 1 "C:\Users\santosh\Dropbox\cnadph files"

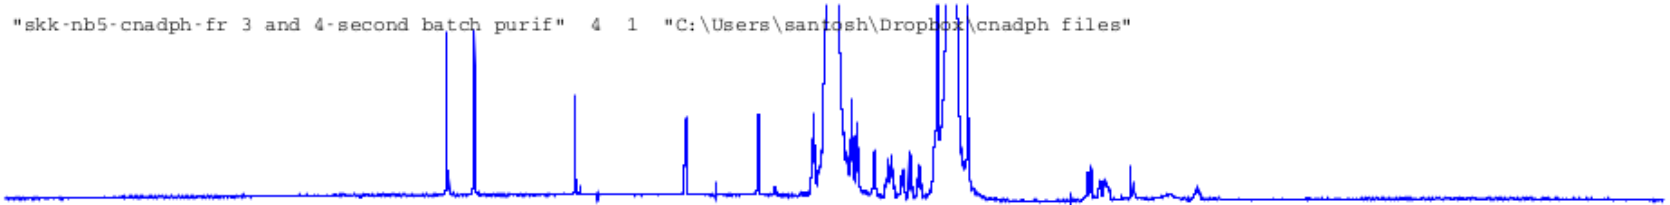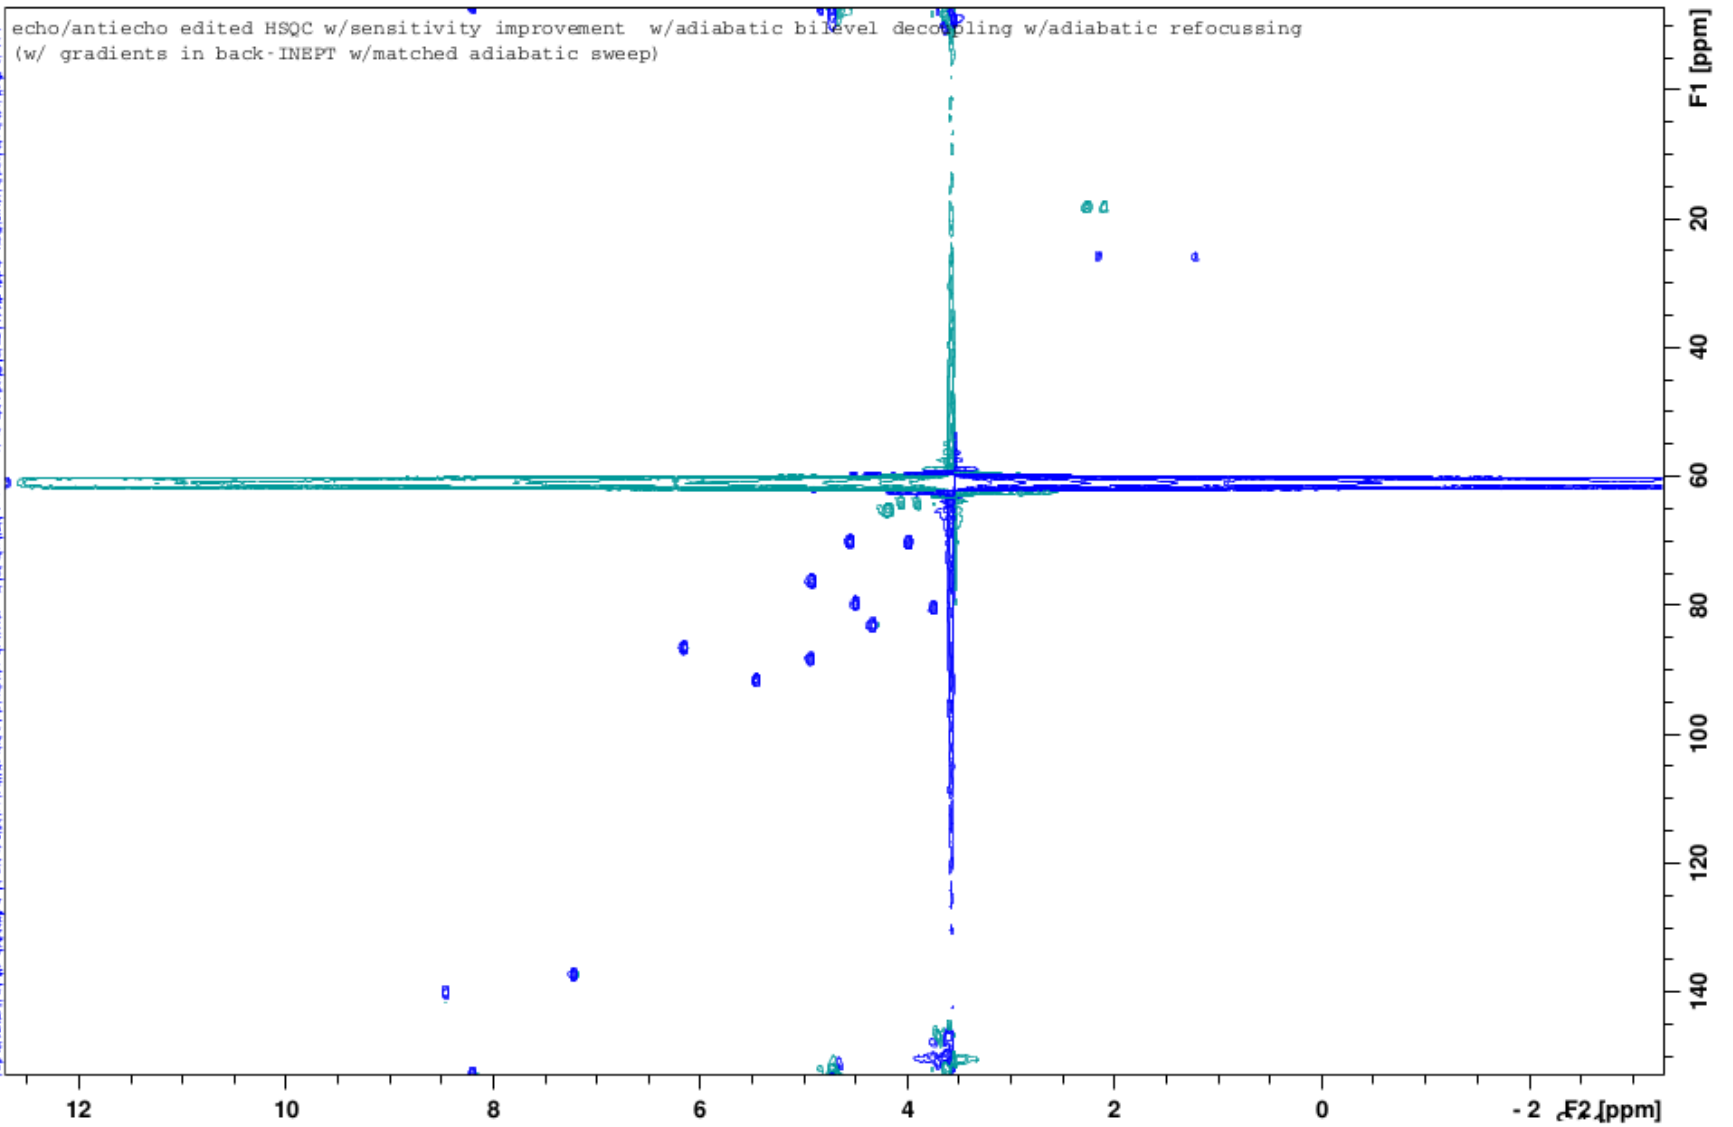

"skk-nb5-cnadph-fr 3 and 4-second batch purif" 4 1 "C:\Users\santosh\Dropbox\cnadph files"

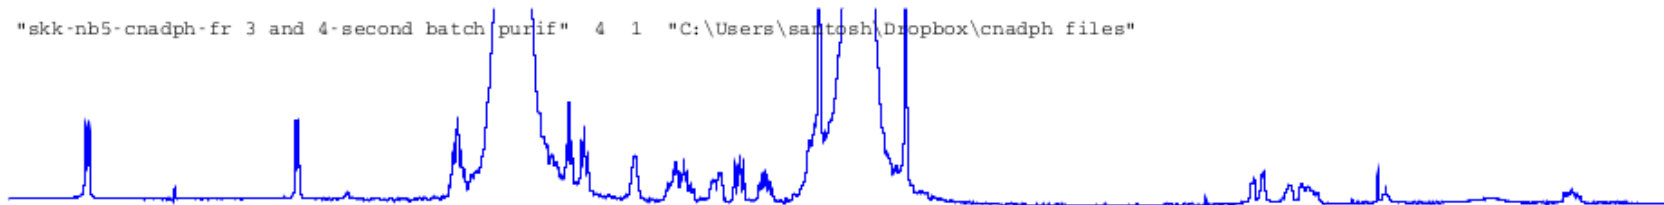

echo/antiecho edited HSQC w/sensitivity improvement w/adiabatic bilevel decoupling w/adiabatic refocussing  
(w/ gradients in back-INEPT w/matched adiabatic sweep)

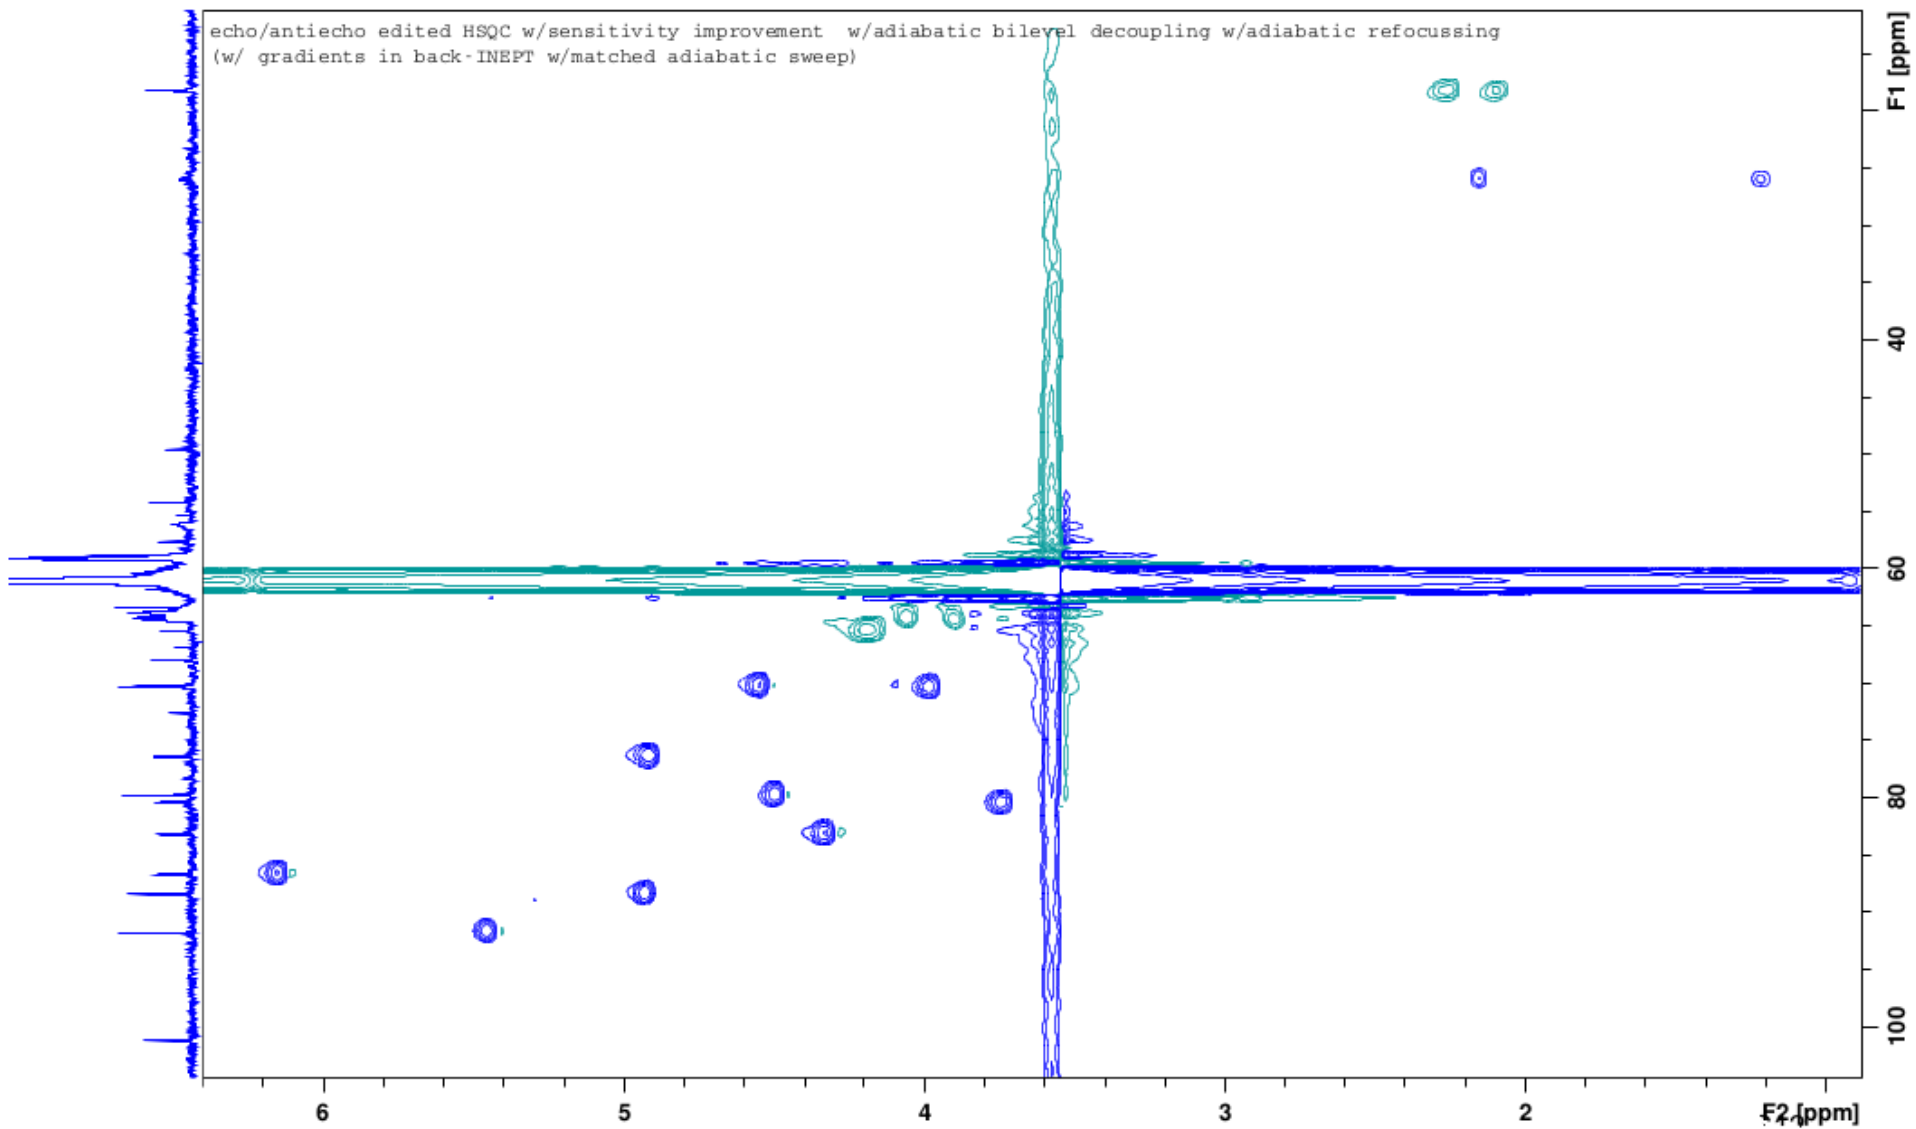

Supplement: pcbi.1009855.s009.pdf [file pcbi.1009855.s009.pdf]
